# Supplementary material for: The synthesis and X-ray crystal structure of [(4-ferrocenylphenylimido)]trichlorobis(triphenylphosphine)rhenium(v) and related ferrocenyl–rhenium(v) compounds†
Source: Royal Society of Chemistry journal article supplement (doi:10.1039/b102372c), 2001-01-01
Supplement: b102372c.doc [file b102372c.doc]

**Supplementary Information**

**Experimental**

**4-Ferrocenylaniline**. This was synthesized by the diazonium method. Ferrocene was reacted with 4-nitrobenzenediazonium chloride to give 4-nitrophenylferrocene which was then reduced in a Parr hydrogenation reactor to provide 4-ferrocenylaniline (69%), mp 155-156_C, lit.5159- 160.5_C;*λ*max.(KBr)/cm-1 3475, 3382, 3102, 1626, 1541, 1463, 1416, 1292, 1113, 1036, 1012, 826, 531, 507; *δ*H (CDCl3) 7.30 (2H, d, *J* 9.0, Ar), 6.65 (2H, d, *J* 8.5, Ar), 4.54 (2H, t, *J* 2.0, C5H4), 4.23 (2H, t, *J* 2.0, C5H4), 4.03 (5H, s, C5H5), 3.63 (2H, br, s, NH2); *δ*C (CDCl3) 144.94, 127.13, 115.16, 69.37, 68.17, 65.79; *m/z* 278 (21%), 277.0546 (M+), 276 (5%), 156 (12%), 121 (4%) (Found: C, 68.8; H, 5.4%; M,+ 277.0546. C16H15FeN requires C, 69.4; H, 5.5%; *M*, 277.0553).

**4-Ferrocenylphenol**. This was synthesized by the diazonium method. 4- Hydroxybenzenediazonium chloride was reacted with ferrocene to give golden yellow crystals of 4-ferrocenylphenol (62%) (from hexane), mp 162_C, lit.,6 165_C; *λ*max(KBr)/cm-1 3515, 1607, 1525, 1454, 1434, 1264, 1210, 1176, 1102, 1027, 998, 885, 839, 816; *δ*H(CDCl3) 7.38 (2 H, d, *J* 8.5, ArH), 6.79 (2 H, d, *J* 8.1, ArH), 4.87 (1 H, s, OH), 4.58 (2 H, t, *J* 1.9, C5H4), 4.28 (2 H, t, *J* 1.9, C5H4), 4.05 (5 H, s, C5H5); *m/z* 280 (39%), 277 (M_, 81%), 276 (100%), 220 (10%), 213 (39%); (Found M+ 278.0388; C16H14FeO requires 278.03918).

**4-Ferrocenylbenzoic acid**. This was synthesized in two steps by the diazonium method. The product was obtained as red crystals, mp 251oC, lit., 250oC dec.7; *λ*max(KBr) 3100, 2985, 2671, 2550, 1678, 1614, 1428, 1185, 1121, 1021, 942, 864, 828, 700, 564, 528; *δ*H(DMSO- d6) 7.85 (2H, d, *J* 7.9, ArH), 7.63 (2H, d, *J* 7.9, ArH), 4.88 (2H, d, *J* 1.8, C5H4), 4.42 (2H, d, *J* 1.8, C5H4), 4.05 (5H, s, C5H5); *δ*C(DMSO-d6) 167.7, 144.9, 129.8, 128.2, 125.9, 83.3, 70.1, 67.1, 31.0; *m/z* 307 (21), 306 (M,+ 100), 304 (6), 168 (8), 162 (5), 140 (7), 139 (9).

**4-Nitrophenylcarboxy-4'-phenylferrocene**. A solution of 4-nitrobenzoic acid (0.95 g, 6 mmol), 4-ferrocenylphenol (1.00 g, 6 mmol) and 4-dimethylaminopyridine (0.15 g, 2 mmol) in anhydrous dichloromethane (180 cm3) was prepared under an atmosphere of dry nitrogen. A solution of dicyclohexylcarbodiimide (0.92 g, 5 mmol) in anhydrous dichloromethane (50 cm3) was then added slowly over 1 min and the solution stirred at room temperature for 72 hr. The solution was then filtered and the solvent removed *in vacuo*. The crude product was purified by flash chromatography on aluminium oxide using a mixture of diethyl ether: dichloromethane (1:1) as the eluant. The solvent was removed from the collected fractions to leave a red solid which was recrystallized from methanol/dichloromethane in the cold (1.20 g, 61%), mp 190oC; *λ*max(KBr) 3110, 3087, 1735, 1606, 1526, 1457, 1409, 1347, 1321, 1284, 1270, 1204, 1167, 1104, 1093, 1080, 1015, 874, 851, 820, 716, 516, 499, 240; *δ*H(CDCl3) 8.39 (2H, d, *J* , ArH), 7.56 (2H, d, *J* , ArH), 7.54 (2H, d, *J* , ArH), 7.17 (2H, d, *J* , ArH), 7.15 (2H, d, *J* , ArH), 4.64 (2H, t, *J* 1.8, C5H4), 4.34 (2H, t, *J* 1.8, C5H4), 4.07 (5H, s, C5H5); *δ*C(CDCl3) 163.7, 151.3, 148.9, 138.6, 135.5, 131.7, 127.5, 124.1, 121.6, 84.8, 70.0, 69.5, 67.0; *m/z* 428 (28%), 427 (M+, 100), 278 (13), 277 (45), 249 (13), 121 (44); (Found: M+ 427.0511; C23H17FeNO4 requires 427.05034).

**4-Aminophenylcarboxy-4'-phenylferrocene**. A mixture of 4-nitrophenylcarboxy-4'- phenylferrocene (0.5 g, 1 mmol), 10% Pd/C (0.3 g) and anhydrous THF (400 cm3) was stirred under hydrogen in a Parr hydrogenation reactor for 48 hr. The solution was then filtered through celite and concentrated to leave 4-aminophenylcarboxy-4'-phenylferrocene as orange crystals (0.39 g, 77%), mp 211-213oC; *λ*max(KBr) 3433, 3558, 3233, 3091, 2966, 2892, 1708, 1633, 1616, 1533, 1458, 1316, 1275, 1216, 1158, 1083, 1008, 875, 858; *δ*H(CDCl3) 8.02 (2H, d, *J* 7.9, ArH), 7.50 (2H, d, *J* 8.6, ArH), 7.12 (2H, d, *J* 8.6, ArH), 6.70 (2H, d, *J* 8.6, ArH), 4.62 (2H, t, *J* 1.8, C5H4), 4.31 (2H, t, *J* 1.8, C5H4), 4.16 (2H, s, NH2), 4.06 (5H, s, C5H5); *δ*C(CDCl3) 165.6, 151.8, 149.7, 137.0, 132.7, 127.4, 122.1, 119.2, 114.3, 85.4, 70.0, 69.3, 67.0; *m/z* 398 (12), 397 (M+, 44), 279 (19), 278 (100), 277 (7), 276 (7), 121 (11), 120 (37); (Found: M+, 397.0764; C23H19FeNO2 requires M 397.0762).

**4-Methoxyphenylferrocene**.To 90% aqueous ethanol which was degassed by nitrogen bubbling for 48 h, deaerated by the freeze-thaw method (3 cycles) and degassed by nitrogen bubbling for a further 24 h was added 4-methoxybenzeneboronic acid (0.79 g, 6.48 mmol), iodoferrocene (1.00 g, 3.22 mmol), barium hydroxide (1.42 g, 4.50 mmol) and palladium acetate (0.15 g, 0.67 mmol) under nitrogen. The reaction mixture was vigorously shaken for 30 min and then allowed to stir for 72 h under nitrogen at room temperature. The solution was then filtered, the solvent removed in vacuo and the residue extracted into diethyl ether (100 cm3). The ethereal solution was washed with water and then dried over anhydrous sodium sulfate. The solvent was again removed in vacuo and the residue was passed through a column of silica gel. Hexane was used to elute recovered iodoferrocene (0.16 g, conversion 84%) and the solvent system hexane/dichloromethane (8:2) was used to elute 4-methoxyphenylferrocene which was obtained as an orange solid (0.46 g, 49%), mp 113_C, lit.,6 112-114_C; *λ*max(KBr)/cm-1 2955, 2924, 2854, 1607, 1524, 1501, 1458, 1436, 1276, 1248, 1180, 1104, 1035, 811; *δ*H(CDCl3) 7.42 (2H, d, *J* 8.8, ArH), 6.86 (2H, d, *J* 8.8, ArH), 4.58 (2H, t, *J* 1.8, C5H4), 4.28 (2H, t, *J* 1.8, C5H4), 4.05 (5H, s, C5H5), 3.83 (3H, s, OCH3); *m/z* 292 (M+, 100%), 277 (23%), 249 (14%), 214 (9%), 199 (7%), 128 (7%), 122 (27%).

**Table 7** Re=O bond distances (Ǻ) in compounds of the type ReOCl3(PR3)2

| Compound | Re=O bond length () |
| --- | --- |
| [ReCl3(dppf)O] | 1.735 (6) |
| *mer-trans*-[ReOCl3(PPh3)2](monoclinic) | 1.663 (5)1 |
| *mer-trans*-[ReOCl3(PPh3)2] (triclinic) | 1.730 (2)1 |
| *fac-cis*-[ReOCl3(PMe3)2] | 1.670 (5)8 |
| *mer-trans*-[ReOCl3(PMe3)2] | 1.819 (3)8 |

References

1 A.-M. Lebuis and A.L. Beauchamp, *Can. J. Chem*., 1993, **71**, 441.

2 J.M. Mayer, *Inorg. Chem*., 1988, **27**, 3899.

3 (a) V. Sergienko and M.A. Porai-Koshits, *Koord. Khim*., 1982, **8**, 251 (Engl. Trans. 130); (b) H.W.W. Ehrlich and P.G. Owston, *J. Chem. Soc*., 1963, 4368.

4 T.M. Miller, K.J. Ahmed and M.S. Wrighton, *Inorg. Chem*., 1989, **28**, 2347.

5 A.N. Nesmeyanov, E.G. Perevalova, R.V. Golovnya and L. Shilovtseva, *Dokl. Akad.* *Nauk SSSR*, 1955, **102**, 535.

6 G.D. Broadhead and P.L. Pauson, *J. Chem. Soc*., 1955, 367.

7 C. Imrie, C. Loubser, P. Engelbrecht and C.W. McCleland, *J. Chem. Soc., Perkin Trans* *1*, 1999, 2513.

8 A.L. Ondracek, P.E. Fanwick and R.A. Walton, *Inorg. Chim. Acta*., 1998, **267**, 123.
